# Supplementary material
Source: Royal Society of Chemistry journal article supplement (doi:10.1039/d6gc02039a)
Supplement: d6gc02039a1.pdf [file d6gc02039a1.pdf]

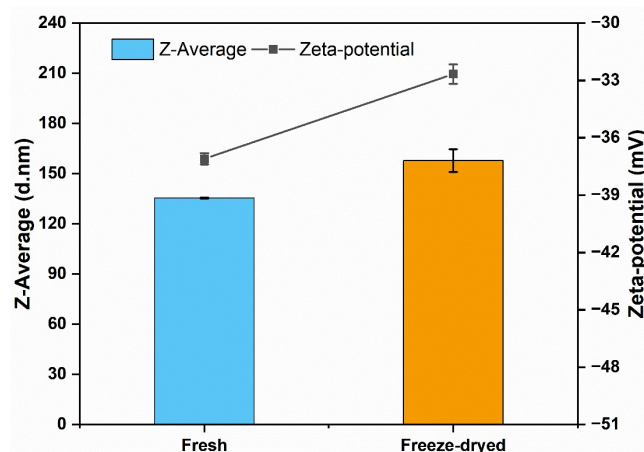

**Fig. S1** Z-average hydrodynamic diameter and zeta potential of the fresh and freeze-dried Fe<sub>3</sub>O<sub>4</sub> nanoparticles.

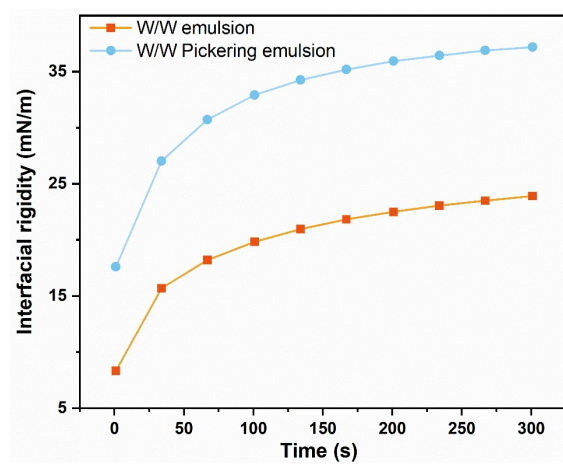

**Fig. S2** Time-dependent interfacial rigidity profiles of the W/W emulsion and the  $\text{Fe}_3\text{O}_4$  NPs-stabilized W/W Pickering emulsion.

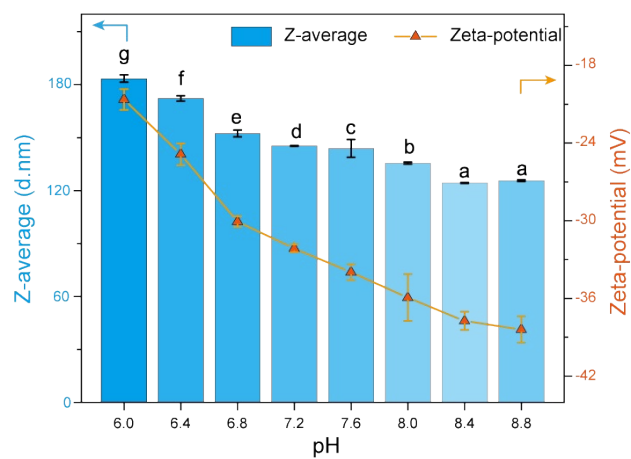

**Fig. S3** Z-average hydrodynamic diameter and zeta potential of the Fe<sub>3</sub>O<sub>4</sub> NPs at varying pH values (6.0–8.8). Different letters indicate significant differences ( $p < 0.05$ ).

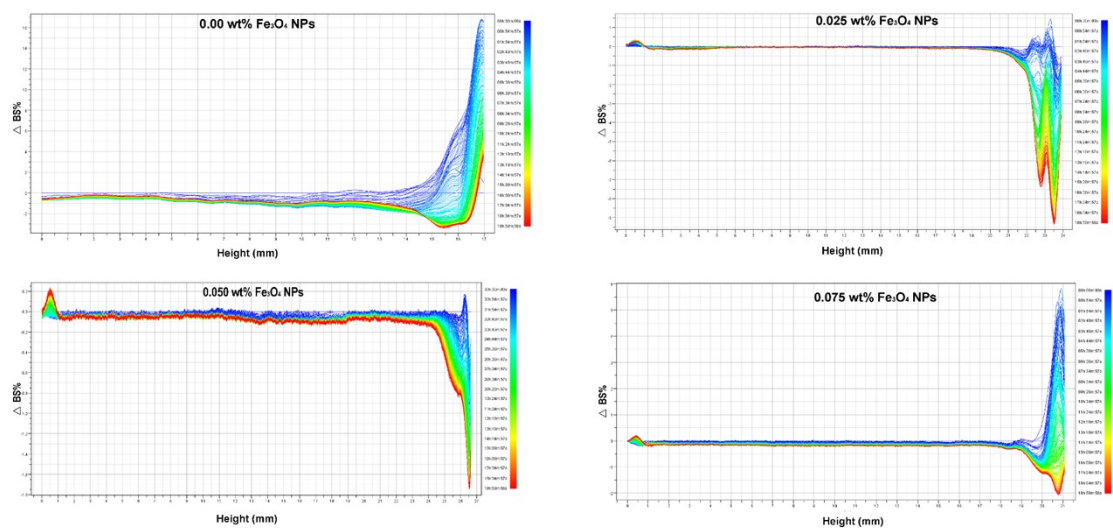

**Fig. S4** Dynamic delta backscattering ( $\Delta$ BS) profiles of the emulsions containing different mass fractions of  $\text{Fe}_3\text{O}_4$  NPs (0.000, 0.025, 0.050, and 0.075 wt.%).

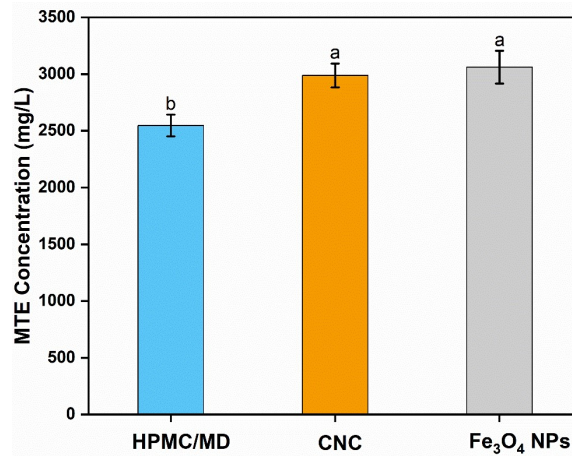

**Fig. S5** Comparison of MTE yields in the bare HPMC/MD W/W emulsion, the CNC-stabilized W/W Pickering emulsion, and the Fe<sub>3</sub>O<sub>4</sub> NPs-stabilized W/W Pickering emulsion. Different letters indicate significant differences ( $p < 0.05$ ).
